# Supplementary material for: Methylation profiling and evaluation of demethylating therapy in renal cell carcinoma
Source: PubMed Central journal article supplement (PMC3848591; doi:10.1186/1868-7083-5-16), 2013-09-13
Supplement: 1868-7083-5-16-S1.pdf [file 1868-7083-5-16-S1.pdf]

|                                |                   | <i>Yoshimoto et al. 2001</i> | <i>Toma et al. 2007</i> | <i>Klatte et al. 2008</i> | <i>Zhang et al. 2009</i> | <i>572</i> |     |              |
|--------------------------------|-------------------|------------------------------|-------------------------|---------------------------|--------------------------|------------|-----|--------------|
|                                | <b>Sample No.</b> | 118                          | 118                     | 26                        | 22                       | 246        | 42  | <b>Total</b> |
| <b>Chromosomal Abnormality</b> | <b>-3p</b>        | 67%                          | 98%                     | 81%                       | 91%                      | 60%        | 90% | <b>74%</b>   |
|                                | <b>+5q</b>        | n/a                          | 57%                     | 58%                       | 45%                      | 33%        | 47% | <b>43%</b>   |
|                                | <b>-14q</b>       | 29%                          | 63%                     | 35%                       | 36%                      | 28%        | 30% | <b>36%</b>   |
|                                | <b>+7</b>         | n/a                          | 19%                     | 35%                       | 32%                      | 26%        | 42% | <b>26%</b>   |
|                                | <b>-8p</b>        | n/a                          | 34%                     | n/a                       | n/a                      | 20%        | 25% | <b>24%</b>   |
|                                | <b>-6q</b>        | n/a                          | 24%                     | 31%                       | 27%                      | 17%        | 17% | <b>20%</b>   |
|                                | <b>-9p</b>        | n/a                          | 24%                     | 19%                       | 32%                      | 19%        | 18% | <b>19%</b>   |
|                                | <b>-4p</b>        | n/a                          | 14%                     | n/a                       | n/a                      | 15%        | 5%  | <b>13%</b>   |

**Additional file 1 Table S1:** Previously Published Common Deletions and Amplifications/ Duplications Associated with Renal Cell Carcinoma (RCC).
