# Supplementary material for: Methylation profiling and evaluation of demethylating therapy in renal cell carcinoma
Source: PubMed Central journal article supplement (PMC3848591; doi:10.1186/1868-7083-5-16), 2013-09-13

# Additional file 2 Figure S1A

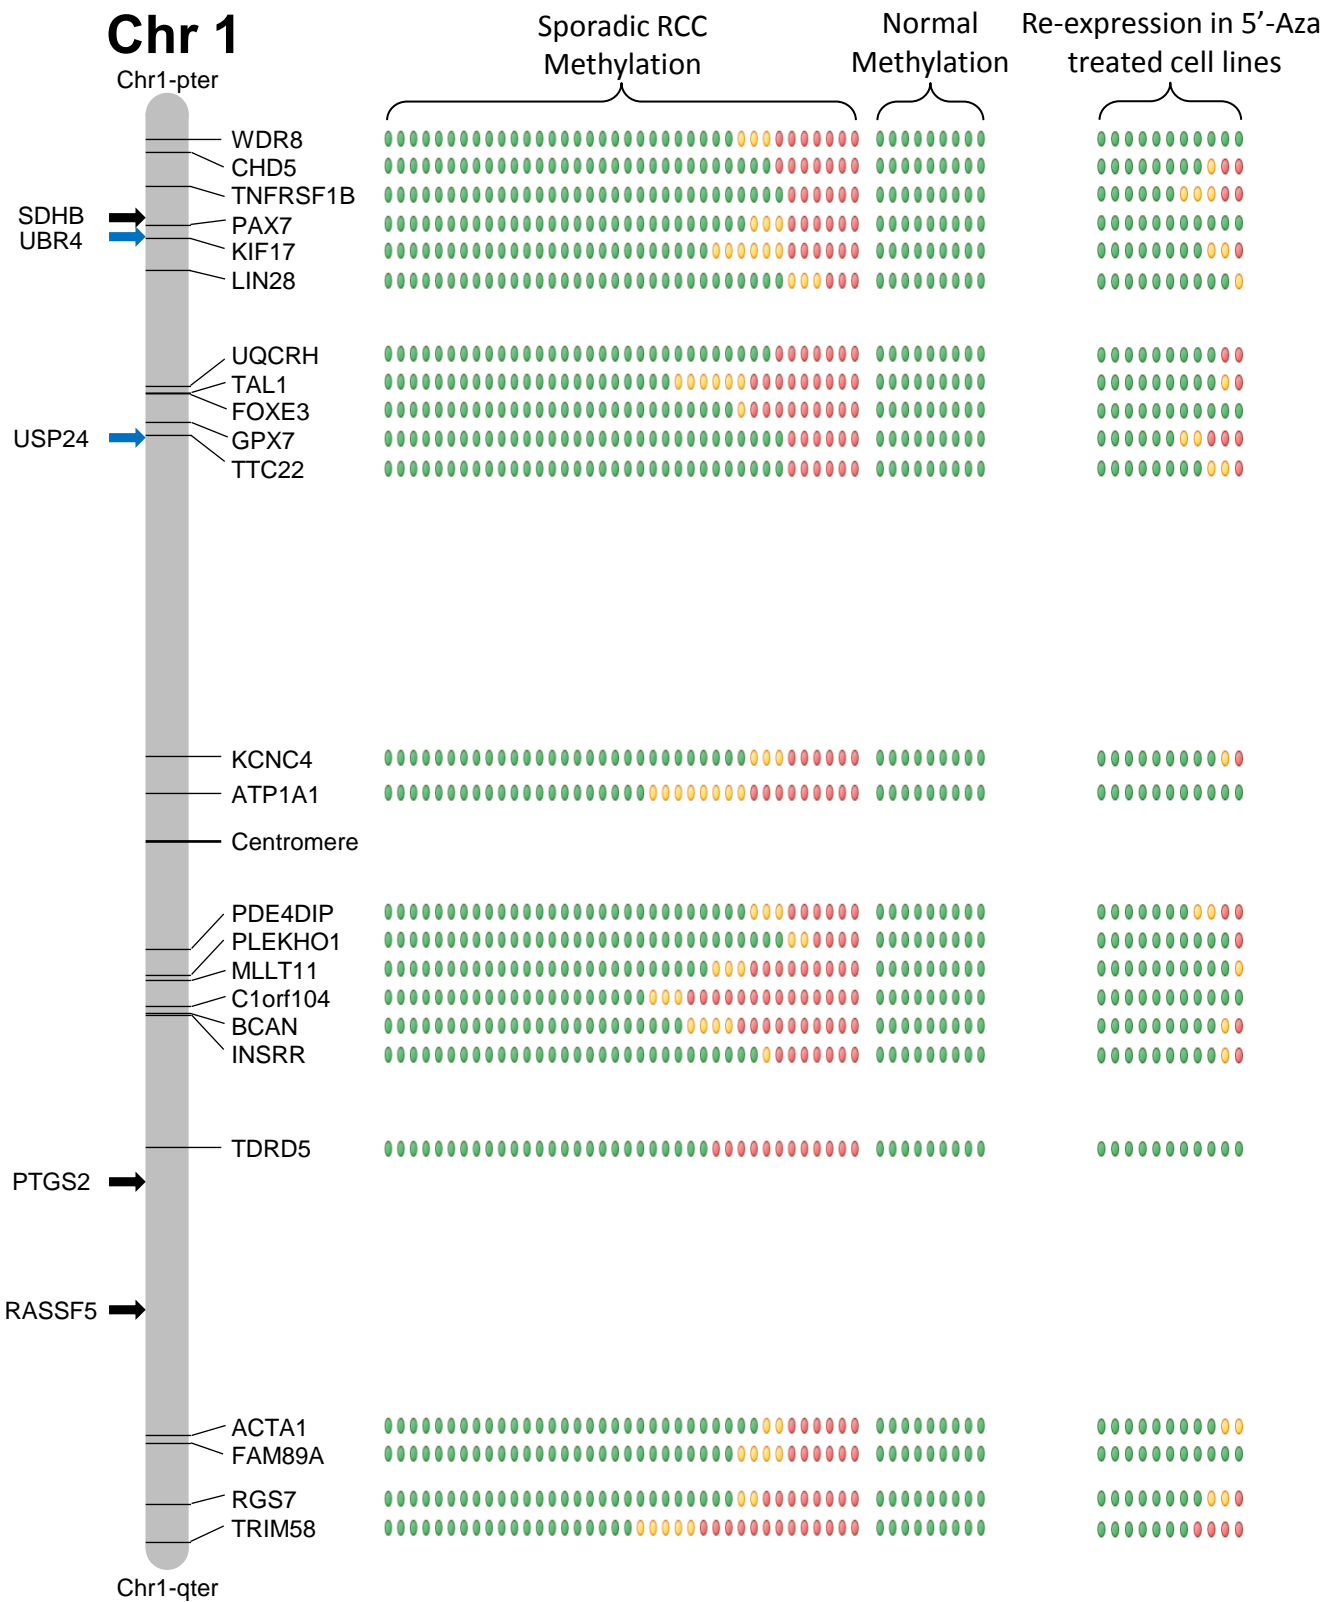

**Additional file 2 Figure S1B**

**Chr 3p**

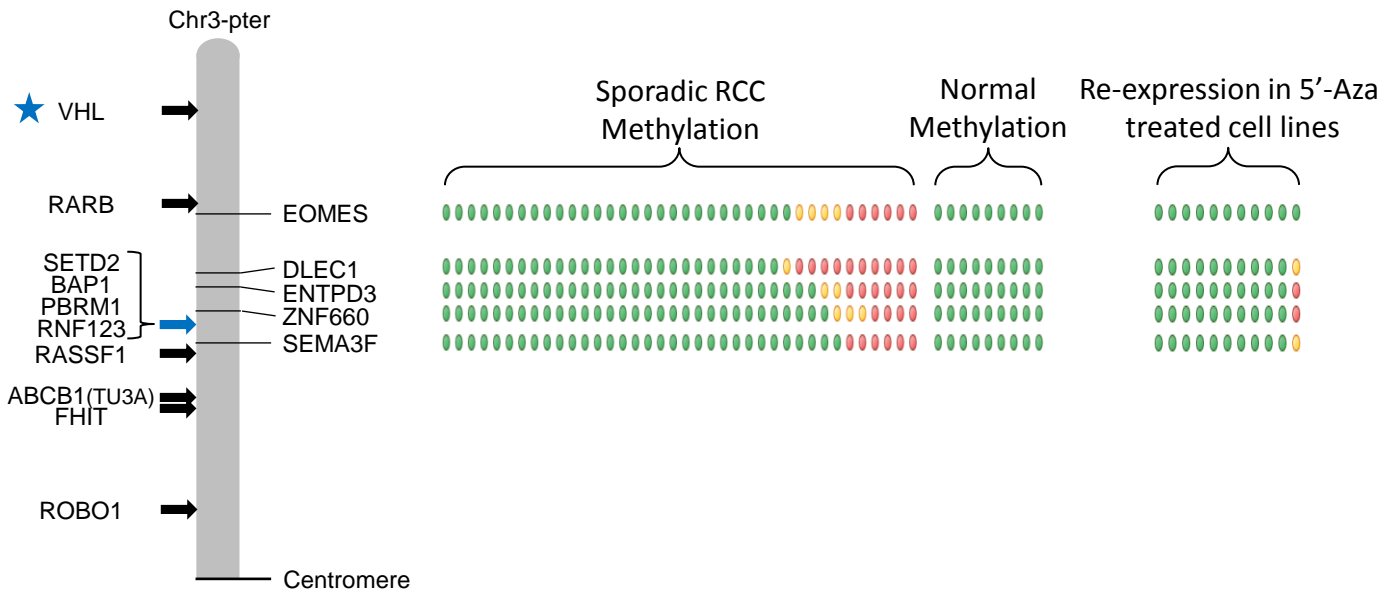

**Chr 14q**

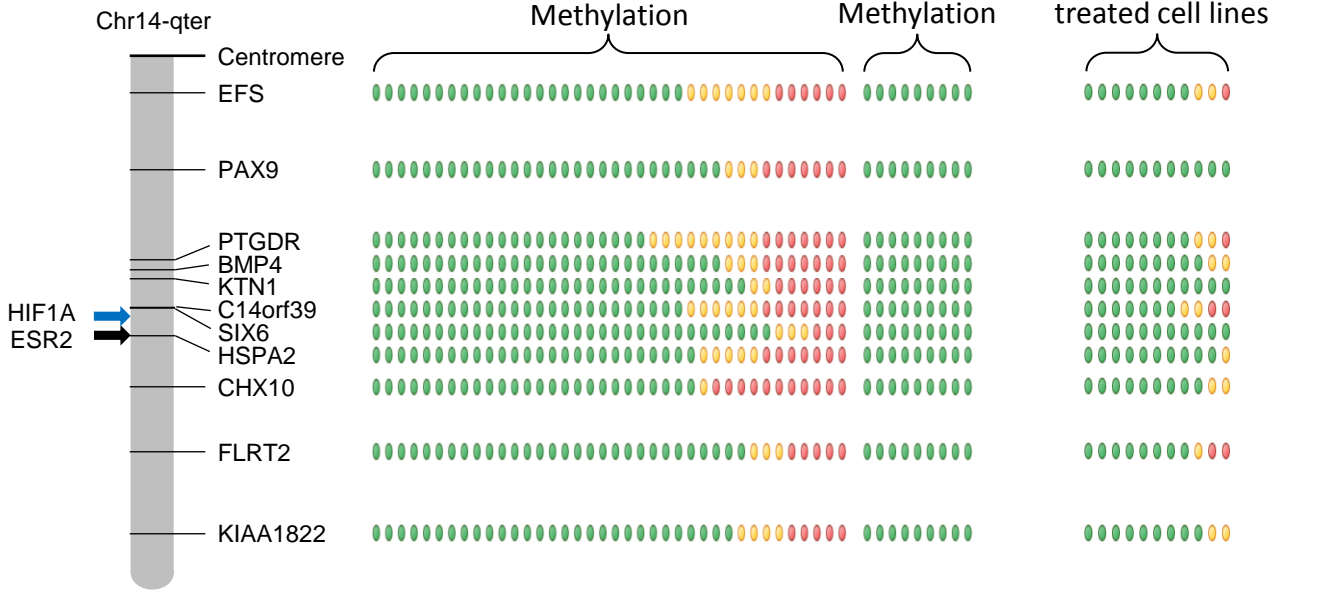

**Additional file 2 Figure S1C**

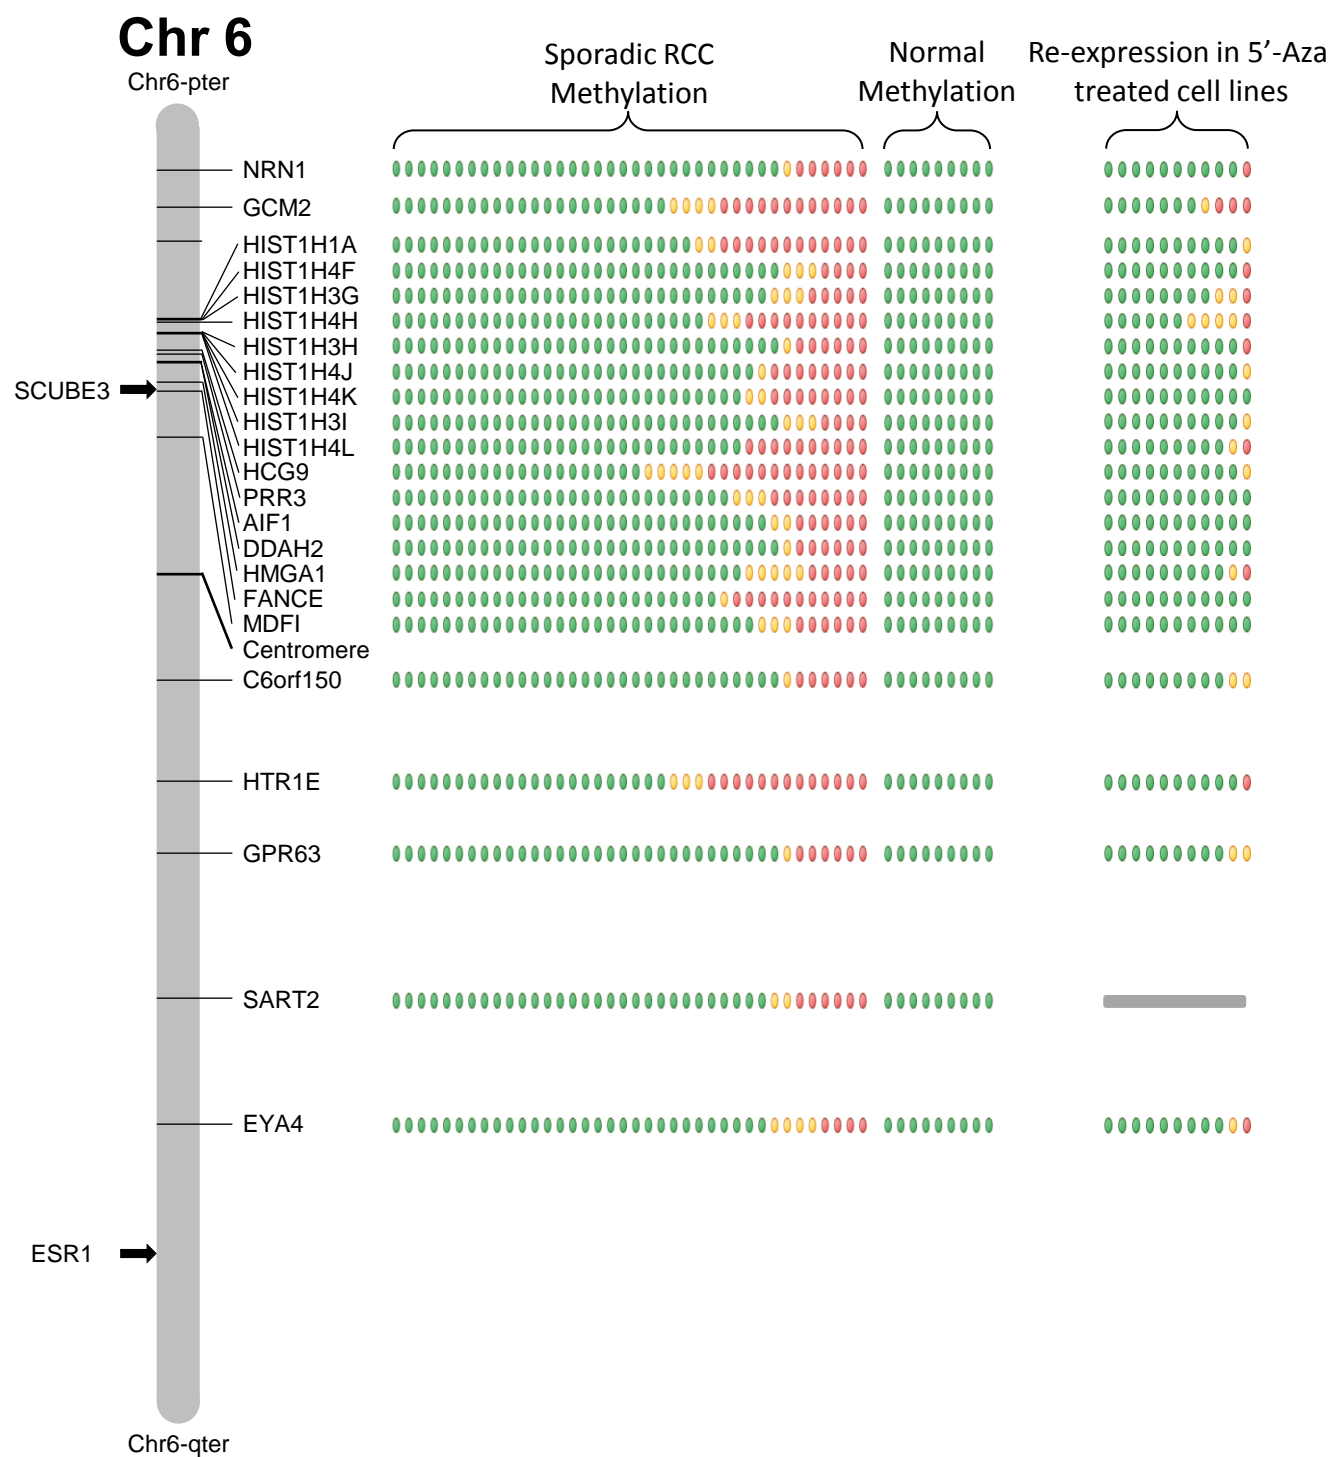

# Chr 9

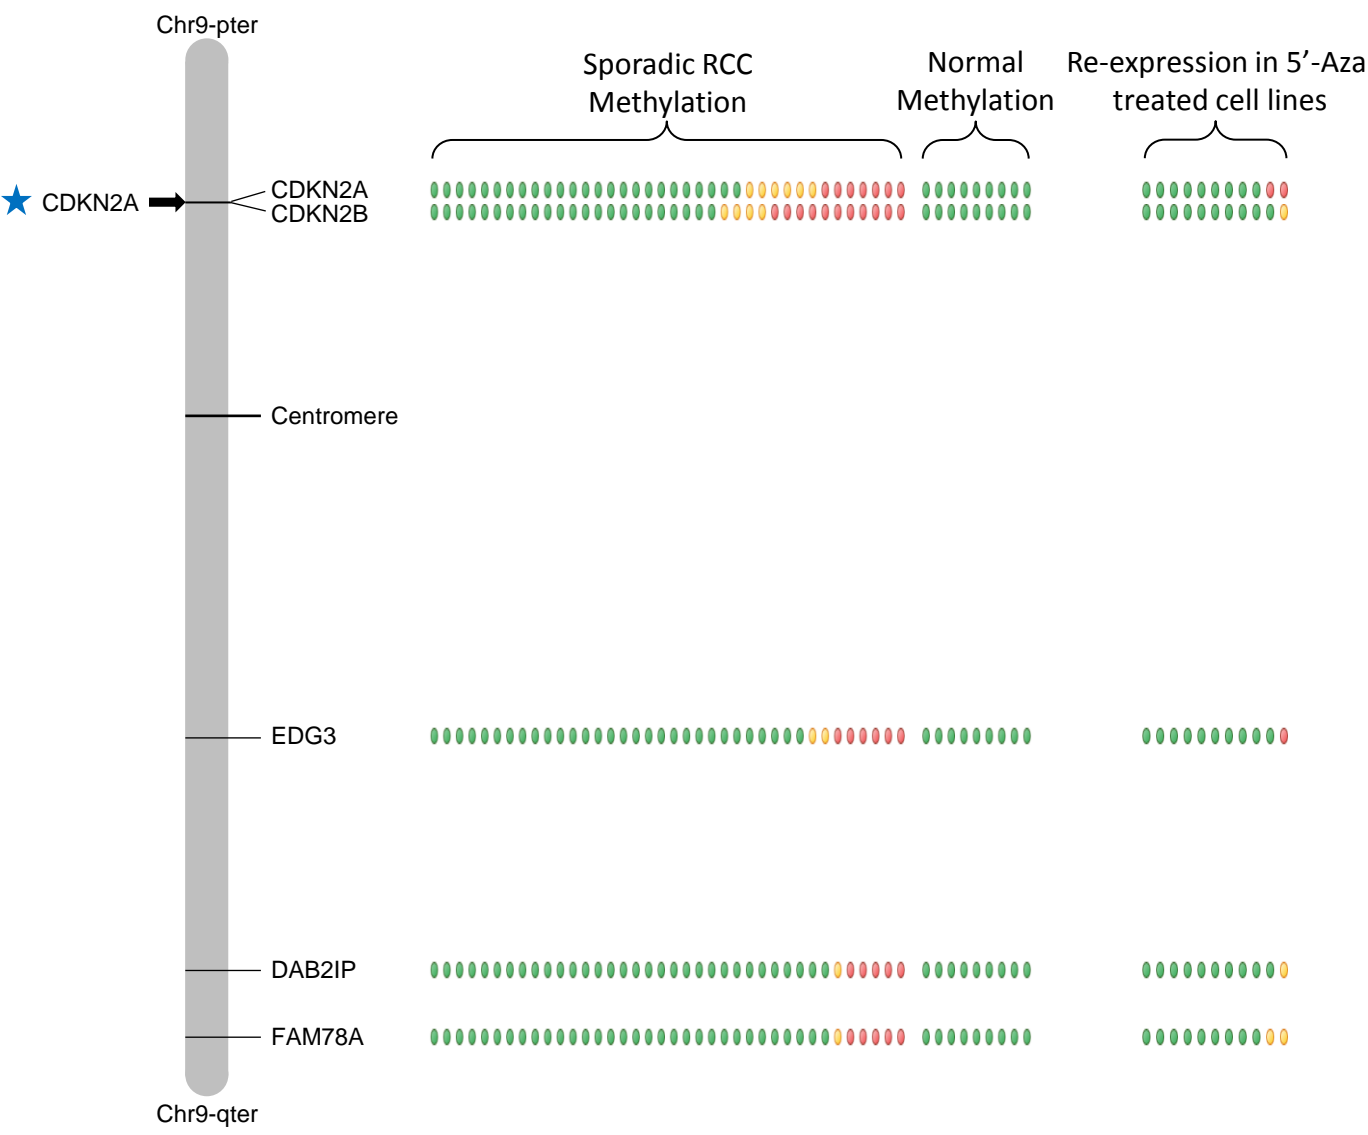

Supplement: 1868-7083-5-16-S2.pdf [file 1868-7083-5-16-S2.pdf]
