# Supplementary material for: Methylation profiling and evaluation of demethylating therapy in renal cell carcinoma
Source: PubMed Central journal article supplement (PMC3848591; doi:10.1186/1868-7083-5-16), 2013-09-13

**Additional file 3 Figure S2A**

**Chr 5q**

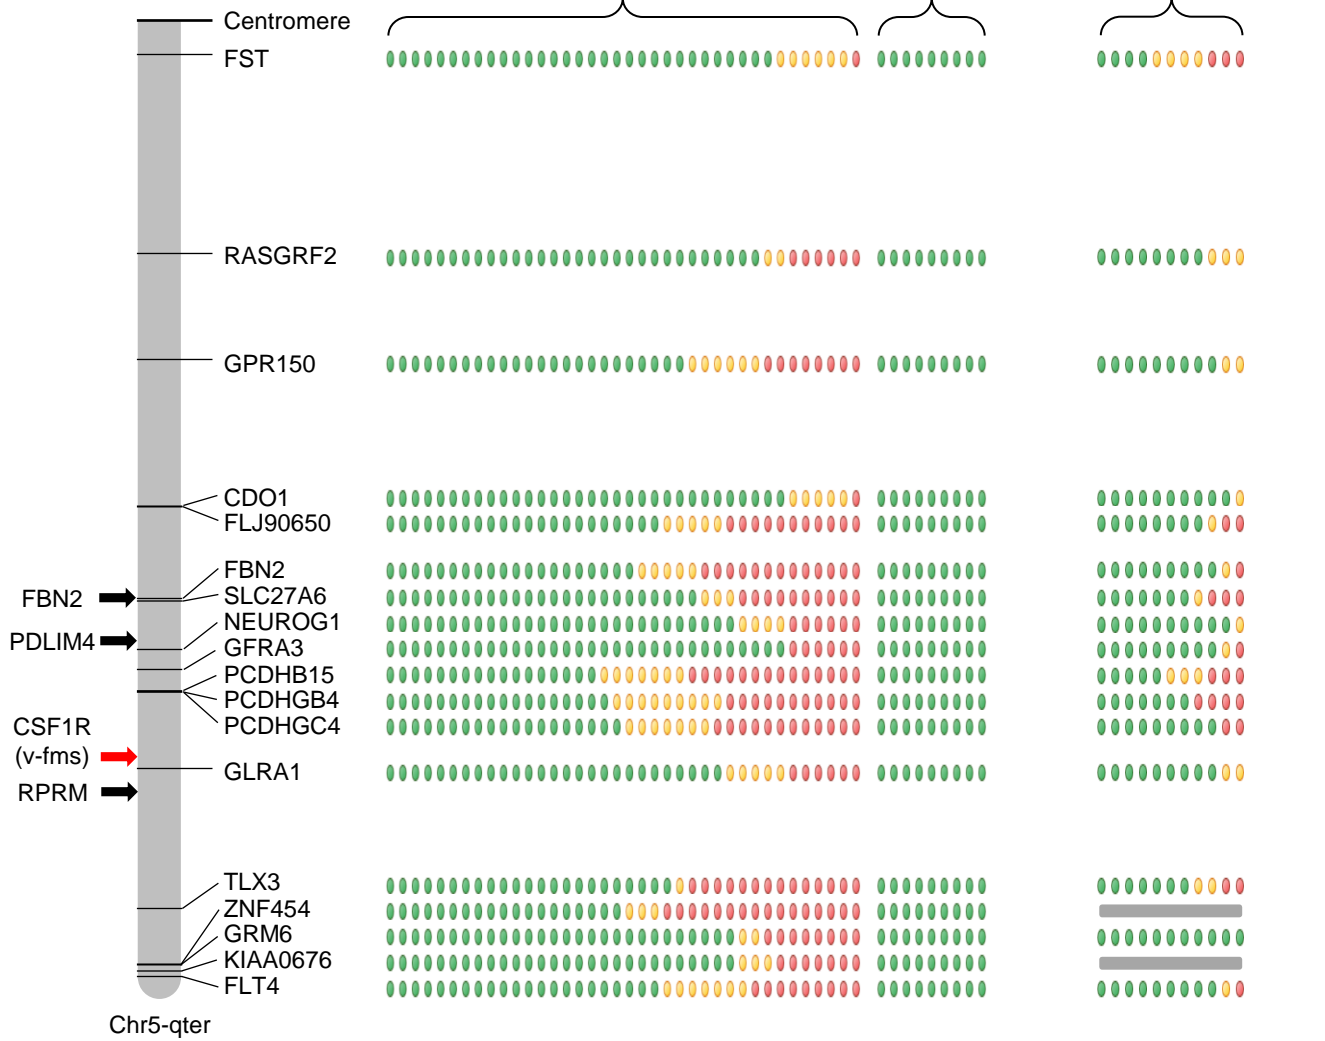

**Chr 20**

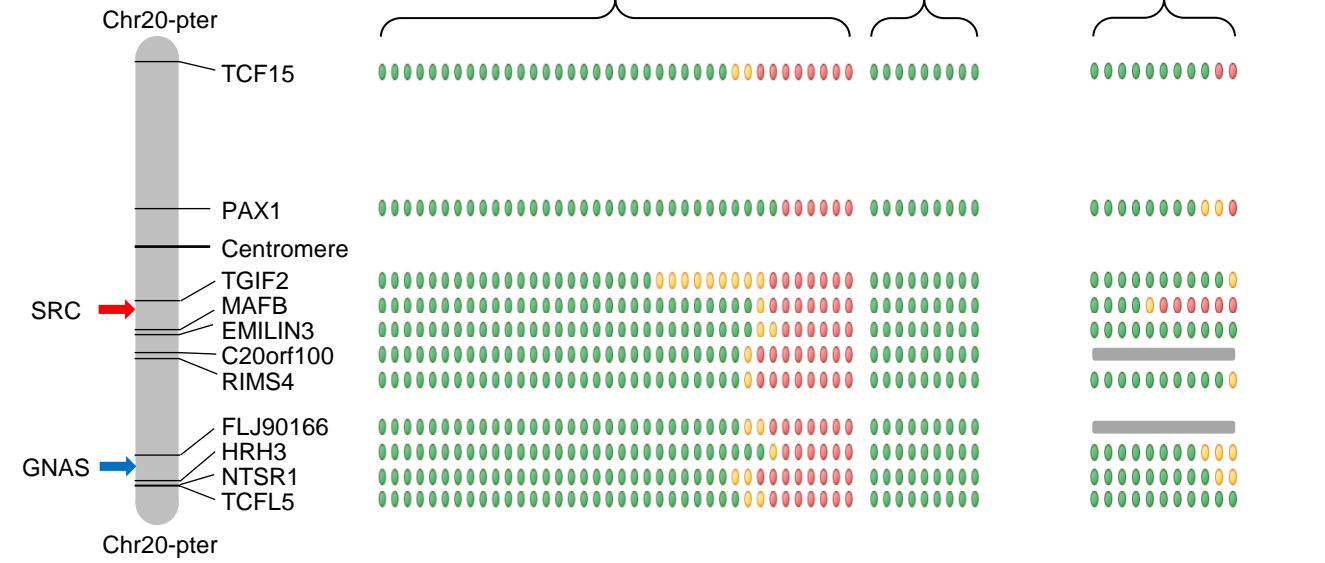

# Additional file 3 Figure S2B

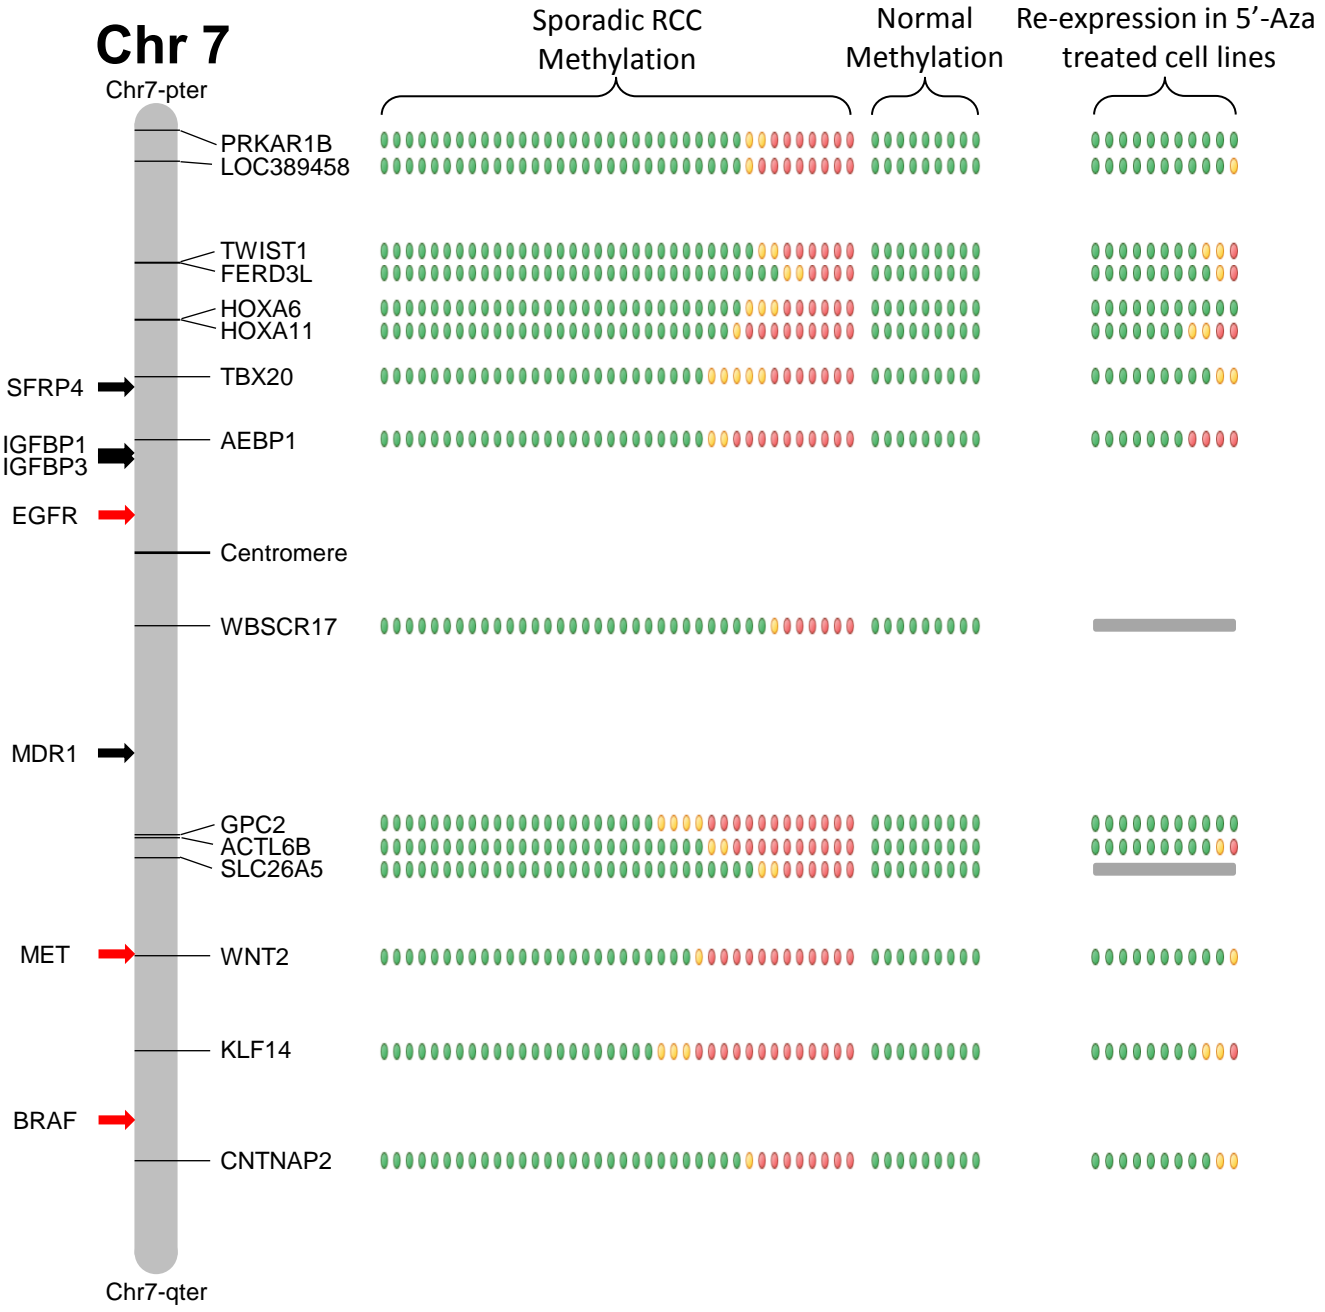

Supplement: 1868-7083-5-16-S3.pdf [file 1868-7083-5-16-S3.pdf]
