# Supplementary material for: Methylation profiling and evaluation of demethylating therapy in renal cell carcinoma
Source: PubMed Central journal article supplement (PMC3848591; doi:10.1186/1868-7083-5-16), 2013-09-13

**Additional file 4 Figure S3**

*AEBP1*

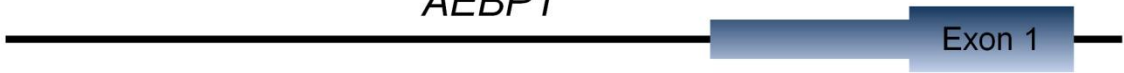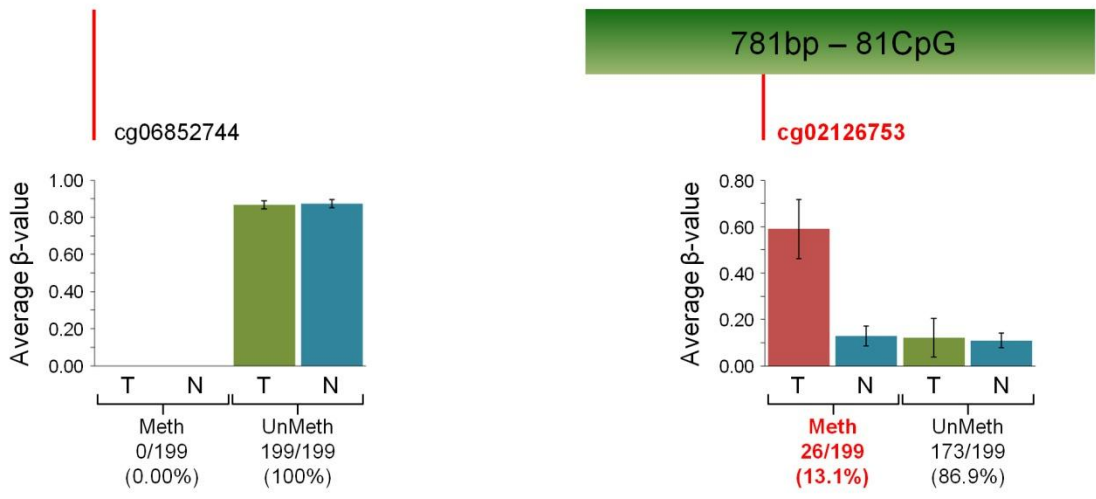

*TMEM74*

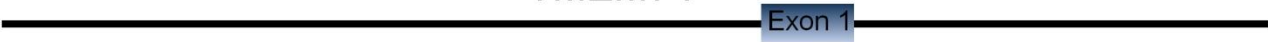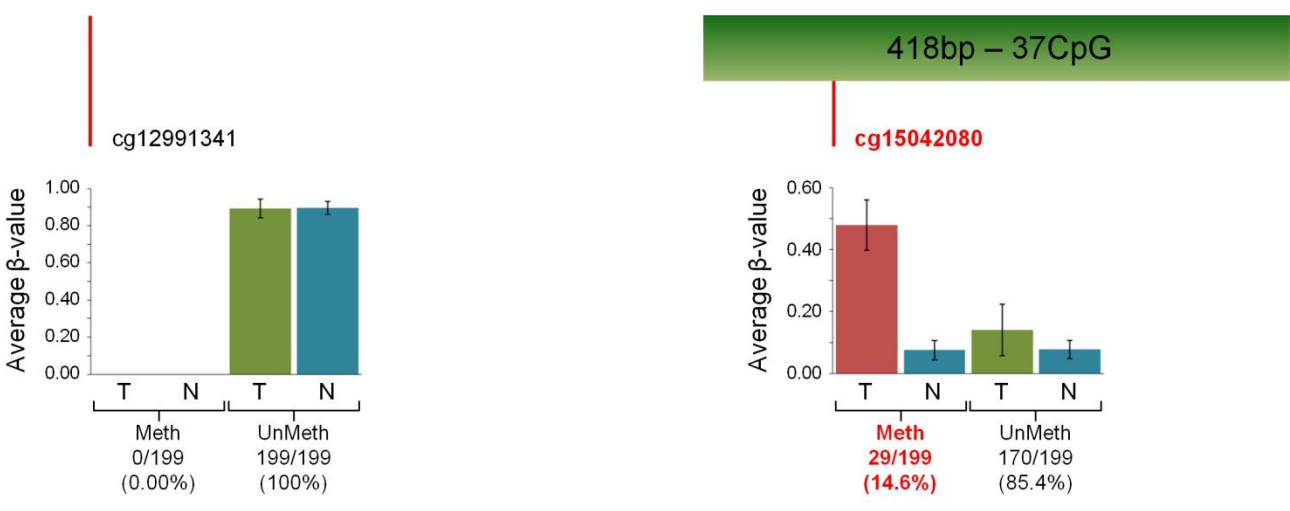

Supplement: 1868-7083-5-16-S4.pdf [file 1868-7083-5-16-S4.pdf]
