# Supplementary material for: Methylation profiling and evaluation of demethylating therapy in renal cell carcinoma
Source: PubMed Central journal article supplement (PMC3848591; doi:10.1186/1868-7083-5-16), 2013-09-13
Supplement: 1868-7083-5-16-S5.pdf [file 1868-7083-5-16-S5.pdf]

|     |                              |            |            |            |            |            |   |            |            |            |            |            |   |   |   |   |   |   |   |   |              |
|-----|------------------------------|------------|------------|------------|------------|------------|---|------------|------------|------------|------------|------------|---|---|---|---|---|---|---|---|--------------|
| 181 | TCGA-BP-4986-11A-01D-1332-05 | 0          | 0          | 0          | 0          | 0          | 0 | 0          | 0          | 0          | 0          | 0          | 0 | 0 | 0 | 0 | 0 | 0 | 0 | 0 | TCGA-BP-4986 |
| 182 | TCGA-BP-4987-11A-01D-1332-05 | 0          | 0          | 0          | 0          | 0          | 0 | 0          | 0          | 0          | 0          | 0          | 0 | 0 | 0 | 0 | 0 | 0 | 0 | 0 | TCGA-BP-4987 |
| 183 | TCGA-BP-4988-11A-01D-1332-05 | 0          | 0          | 1          | 0          | 0          | 0 | 0          | 0          | 0          | 0          | 0          | 0 | 0 | 0 | 0 | 0 | 0 | 0 | 0 | TCGA-BP-4988 |
| 184 | TCGA-BP-4989-11A-01D-1332-05 | 1          | 1          | 0          | 0          | 0          | 0 | 0          | 0          | 0          | 0          | 0          | 0 | 0 | 0 | 0 | 0 | 0 | 0 | 0 | TCGA-BP-4989 |
| 185 | TCGA-BP-4991-11A-01D-1332-05 | 0          | 0          | 1          | 0          | 0          | 0 | 0          | 0          | 0          | 0          | 0          | 0 | 0 | 0 | 0 | 0 | 0 | 0 | 0 | TCGA-BP-4991 |
| 186 | TCGA-BP-4992-11A-01D-1332-05 | 0          | 0          | 0          | 0          | 0          | 1 | 0          | 0          | 0          | 0          | 0          | 0 | 0 | 0 | 0 | 0 | 0 | 0 | 0 | TCGA-BP-4992 |
| 187 | TCGA-BP-4994-11A-01D-1332-05 | 0          | 0          | 0          | 0          | 0          | 0 | 0          | 0          | 0          | 0          | 0          | 0 | 0 | 0 | 0 | 0 | 0 | 0 | 0 | TCGA-BP-4994 |
| 188 | TCGA-BP-4995-11A-01D-1332-05 | 0          | 0          | 1          | 0          | 0          | 0 | 0          | 0          | 0          | 0          | 0          | 0 | 0 | 0 | 0 | 0 | 0 | 0 | 0 | TCGA-BP-4995 |
| 189 | TCGA-BP-4998-11A-01D-1332-05 | 0          | 0          | 0          | 0          | 0          | 0 | 0          | 0          | 0          | 0          | 0          | 0 | 0 | 0 | 0 | 0 | 0 | 0 | 0 | TCGA-BP-4998 |
| 190 | TCGA-BP-4999-11A-01D-1332-05 | 0          | 0          | 0          | 0          | 0          | 0 | 0          | 0          | 0          | 0          | 0          | 0 | 0 | 0 | 0 | 0 | 0 | 0 | 0 | TCGA-BP-4999 |
| 191 | TCGA-BP-5000-11A-01D-1332-05 | 1          | 1          | 0          | 0          | 0          | 0 | 0          | 0          | 0          | 0          | 0          | 0 | 0 | 0 | 0 | 0 | 0 | 0 | 0 | TCGA-BP-5000 |
| 192 | TCGA-BP-5001-11A-01D-1332-05 | 0          | 0          | 0          | 0          | 0          | 0 | 0          | 0          | 0          | 0          | 0          | 0 | 0 | 0 | 0 | 0 | 0 | 0 | 0 | TCGA-BP-5001 |
| 193 | TCGA-BP-5004-11A-01D-1332-05 | 0          | 1          | 0          | 0          | 0          | 0 | 0          | 0          | 0          | 0          | 0          | 0 | 0 | 0 | 0 | 0 | 0 | 0 | 0 | TCGA-BP-5004 |
| 194 | TCGA-BP-5006-11A-01D-1332-05 | 0          | 0          | 0          | 0          | 0          | 0 | 0          | 0          | 0          | 0          | 0          | 0 | 0 | 0 | 0 | 0 | 0 | 0 | 0 | TCGA-BP-5006 |
| 195 | TCGA-BP-5007-11A-01D-1332-05 | 0          | 0          | 0          | 0          | 0          | 0 | 0          | 0          | 0          | 0          | 0          | 0 | 0 | 0 | 0 | 0 | 0 | 0 | 0 | TCGA-BP-5007 |
| 196 | TCGA-BP-5008-11A-01D-1332-05 | 0          | 0          | 0          | 0          | 0          | 0 | 0          | 0          | 0          | 0          | 0          | 0 | 0 | 0 | 0 | 0 | 0 | 0 | 0 | TCGA-BP-5008 |
| 197 | TCGA-BP-5009-11A-01D-1332-05 | 1          | 1          | 1          | 1          | 0          | 0 | 1          | 0          | 0          | 0          | 0          | 0 | 0 | 0 | 0 | 0 | 0 | 0 | 0 | TCGA-BP-5009 |
| 198 | TCGA-CJ-4899-11A-01D-1332-05 | 0          | 0          | 0          | 0          | 0          | 0 | 0          | 0          | 0          | 0          | 0          | 0 | 0 | 0 | 0 | 0 | 0 | 0 | 0 | TCGA-CJ-4899 |
| 199 | TCGA-CJ-4900-11A-01D-1332-05 | 0          | 1          | 1          | 0          | 0          | 0 | 0          | 0          | 0          | 0          | 0          | 0 | 0 | 0 | 0 | 0 | 0 | 0 | 0 | TCGA-CJ-4900 |
|     |                              | 70         | 60         | 29         | 29         | 26         |   | 13         | 18         | 0          | 6          | 0          |   |   |   |   |   |   |   |   |              |
|     |                              | cg21303386 | cg23290344 | cg12991340 | cg02844545 | cg01216753 |   | cg24800810 | cg18267374 | cg12991341 | cg09829319 | cg06852744 |   |   |   |   |   |   |   |   |              |
|     |                              | RGS7       | NEF3       | TMEM74     | GCM2       | AEBP1      |   | RGS7       | NEF3       | TMEM74     | GCM2       | AEBP1      |   |   |   |   |   |   |   |   |              |

**Additional file 5 Table S2:** Methylation and Clinical Data for the 199 TCGA Tumour and Associated Normal Sa

| age at initial pathologic diagnosis | days to last known alive or death | gender | histological type                 |
|-------------------------------------|-----------------------------------|--------|-----------------------------------|
| 67                                  | 1120                              | MALE   | Kidney Clear Cell Renal Carcinoma |
| 77                                  | 16                                | FEMALE | Kidney Clear Cell Renal Carcinoma |
| 59                                  | 1190                              | MALE   | Kidney Clear Cell Renal Carcinoma |
| 59                                  | 735                               | MALE   | Kidney Clear Cell Renal Carcinoma |
| 57                                  | 1493                              | MALE   | Kidney Clear Cell Renal Carcinoma |
| 67                                  | 1491                              | MALE   | Kidney Clear Cell Renal Carcinoma |
| 70                                  | 1130                              | MALE   | Kidney Clear Cell Renal Carcinoma |
| 52                                  | 1508                              | FEMALE | Kidney Clear Cell Renal Carcinoma |
| 51                                  | 1477                              | MALE   | Kidney Clear Cell Renal Carcinoma |
| 53                                  | 1105                              | MALE   | Kidney Clear Cell Renal Carcinoma |
| 51                                  | 1186                              | MALE   | Kidney Clear Cell Renal Carcinoma |
| 52                                  | 751                               | MALE   | Kidney Clear Cell Renal Carcinoma |
| 47                                  | 1137                              | MALE   | Kidney Clear Cell Renal Carcinoma |
| null                                | null                              | null   | null                              |
| 75                                  | 706                               | MALE   | Kidney Clear Cell Renal Carcinoma |
| 86                                  | 1506                              | FEMALE | Kidney Clear Cell Renal Carcinoma |
| 41                                  | 664                               | MALE   | Kidney Clear Cell Renal Carcinoma |
| 75                                  | 1043                              | FEMALE | Kidney Clear Cell Renal Carcinoma |
| 79                                  | 944                               | MALE   | Kidney Clear Cell Renal Carcinoma |
| 68                                  | 137                               | MALE   | Kidney Clear Cell Renal Carcinoma |
| 74                                  | 549                               | MALE   | Kidney Clear Cell Renal Carcinoma |
| null                                | null                              | null   | null                              |
| 50                                  | 319                               | MALE   | Kidney Clear Cell Renal Carcinoma |
| 46                                  | 872                               | MALE   | Kidney Clear Cell Renal Carcinoma |
| 64                                  | 735                               | MALE   | Kidney Clear Cell Renal Carcinoma |
| 51                                  | 1313                              | FEMALE | Kidney Clear Cell Renal Carcinoma |
| 60                                  | 630                               | MALE   | Kidney Clear Cell Renal Carcinoma |
| 54                                  | 567                               | MALE   | Kidney Clear Cell Renal Carcinoma |
| 69                                  | 574                               | FEMALE | Kidney Clear Cell Renal Carcinoma |
| 52                                  | 861                               | MALE   | Kidney Clear Cell Renal Carcinoma |
| 76                                  | 1097                              | FEMALE | Kidney Clear Cell Renal Carcinoma |
| 34                                  | 1385                              | FEMALE | Kidney Clear Cell Renal Carcinoma |
| 42                                  | 910                               | MALE   | Kidney Clear Cell Renal Carcinoma |
| 60                                  | 1559                              | FEMALE | Kidney Clear Cell Renal Carcinoma |
| 59                                  | 178                               | MALE   | Kidney Clear Cell Renal Carcinoma |
| 73                                  | 194                               | MALE   | Kidney Clear Cell Renal Carcinoma |
| 72                                  | 50                                | FEMALE | Kidney Clear Cell Renal Carcinoma |
| 83                                  | 110                               | MALE   | Kidney Clear Cell Renal Carcinoma |
| 61                                  | 15                                | MALE   | Kidney Clear Cell Renal Carcinoma |

|    |      |        |                                   |
|----|------|--------|-----------------------------------|
| 66 | 709  | FEMALE | Kidney Clear Cell Renal Carcinoma |
| 73 | 255  | FEMALE | Kidney Clear Cell Renal Carcinoma |
| 74 | 2746 | MALE   | Kidney Clear Cell Renal Carcinoma |
| 65 | 3074 | FEMALE | Kidney Clear Cell Renal Carcinoma |
| 60 | 2830 | FEMALE | Kidney Clear Cell Renal Carcinoma |
| 51 | 992  | FEMALE | Kidney Clear Cell Renal Carcinoma |
| 59 | 2718 | MALE   | Kidney Clear Cell Renal Carcinoma |
| 60 | 1820 | FEMALE | Kidney Clear Cell Renal Carcinoma |
| 51 | 1924 | MALE   | Kidney Clear Cell Renal Carcinoma |
| 52 | 2227 | FEMALE | Kidney Clear Cell Renal Carcinoma |
| 46 | 431  | FEMALE | Kidney Clear Cell Renal Carcinoma |
| 49 | 2308 | FEMALE | Kidney Clear Cell Renal Carcinoma |
| 49 | 1966 | MALE   | Kidney Clear Cell Renal Carcinoma |
| 55 | 1661 | FEMALE | Kidney Clear Cell Renal Carcinoma |
| 67 | 1792 | FEMALE | Kidney Clear Cell Renal Carcinoma |
| 48 | 336  | FEMALE | Kidney Clear Cell Renal Carcinoma |
| 69 | 3377 | MALE   | Kidney Clear Cell Renal Carcinoma |
| 70 | 2592 | MALE   | Kidney Clear Cell Renal Carcinoma |
| 67 | 2881 | MALE   | Kidney Clear Cell Renal Carcinoma |
| 64 | 2946 | FEMALE | Kidney Clear Cell Renal Carcinoma |
| 69 | 13   | MALE   | Kidney Clear Cell Renal Carcinoma |
| 76 | 701  | FEMALE | Kidney Clear Cell Renal Carcinoma |
| 72 | 2343 | FEMALE | Kidney Clear Cell Renal Carcinoma |
| 47 | 1893 | MALE   | Kidney Clear Cell Renal Carcinoma |
| 49 | 1879 | MALE   | Kidney Clear Cell Renal Carcinoma |
| 64 | 1955 | MALE   | Kidney Clear Cell Renal Carcinoma |
| 64 | 2964 | FEMALE | Kidney Clear Cell Renal Carcinoma |
| 53 | 1624 | FEMALE | Kidney Clear Cell Renal Carcinoma |
| 75 | 108  | FEMALE | Kidney Clear Cell Renal Carcinoma |
| 75 | 845  | MALE   | Kidney Clear Cell Renal Carcinoma |
| 60 | 1864 | FEMALE | Kidney Clear Cell Renal Carcinoma |
| 52 | 2453 | MALE   | Kidney Clear Cell Renal Carcinoma |
| 36 | 1133 | MALE   | Kidney Clear Cell Renal Carcinoma |
| 56 | 645  | MALE   | Kidney Clear Cell Renal Carcinoma |
| 65 | 460  | FEMALE | Kidney Clear Cell Renal Carcinoma |
| 76 | 2    | FEMALE | Kidney Clear Cell Renal Carcinoma |
| 43 | 2746 | MALE   | Kidney Clear Cell Renal Carcinoma |
| 70 | 562  | FEMALE | Kidney Clear Cell Renal Carcinoma |
| 67 | 1589 | MALE   | Kidney Clear Cell Renal Carcinoma |
| 79 | 2256 | MALE   | Kidney Clear Cell Renal Carcinoma |
| 64 | 1912 | MALE   | Kidney Clear Cell Renal Carcinoma |
| 75 | 1666 | FEMALE | Kidney Clear Cell Renal Carcinoma |
| 62 | 1409 | MALE   | Kidney Clear Cell Renal Carcinoma |
| 57 | 1485 | MALE   | Kidney Clear Cell Renal Carcinoma |
| 74 | 1367 | MALE   | Kidney Clear Cell Renal Carcinoma |
| 68 | 364  | FEMALE | Kidney Clear Cell Renal Carcinoma |
| 51 | 961  | FEMALE | Kidney Clear Cell Renal Carcinoma |

|      |      |        |                                   |
|------|------|--------|-----------------------------------|
| 74   | 332  | FEMALE | Kidney Clear Cell Renal Carcinoma |
| 61   | 375  | MALE   | Kidney Clear Cell Renal Carcinoma |
| 40   | 1034 | MALE   | Kidney Clear Cell Renal Carcinoma |
| 59   | 953  | FEMALE | Kidney Clear Cell Renal Carcinoma |
| 62   | 370  | FEMALE | Kidney Clear Cell Renal Carcinoma |
| 40   | 2208 | MALE   | Kidney Clear Cell Renal Carcinoma |
| 50   | 2324 | MALE   | Kidney Clear Cell Renal Carcinoma |
| 57   | 182  | MALE   | Kidney Clear Cell Renal Carcinoma |
| 42   | 1343 | MALE   | Kidney Clear Cell Renal Carcinoma |
| 79   | 1270 | FEMALE | Kidney Clear Cell Renal Carcinoma |
| 43   | 2184 | MALE   | Kidney Clear Cell Renal Carcinoma |
| 43   | 1467 | FEMALE | Kidney Clear Cell Renal Carcinoma |
| 72   | 400  | FEMALE | Kidney Clear Cell Renal Carcinoma |
| 63   | 1876 | MALE   | Kidney Clear Cell Renal Carcinoma |
| 62   | 161  | MALE   | Kidney Clear Cell Renal Carcinoma |
| 57   | 1884 | FEMALE | Kidney Clear Cell Renal Carcinoma |
| 55   | 1842 | FEMALE | Kidney Clear Cell Renal Carcinoma |
| 52   | 410  | MALE   | Kidney Clear Cell Renal Carcinoma |
| 46   | 1731 | MALE   | Kidney Clear Cell Renal Carcinoma |
| null | null | null   | null                              |
| 49   | 2090 | MALE   | Kidney Clear Cell Renal Carcinoma |
| null | null | null   | null                              |
| 63   | 1378 | MALE   | Kidney Clear Cell Renal Carcinoma |
| 69   | 834  | FEMALE | Kidney Clear Cell Renal Carcinoma |
| 80   | 1638 | FEMALE | Kidney Clear Cell Renal Carcinoma |
| 78   | 2080 | MALE   | Kidney Clear Cell Renal Carcinoma |
| 67   | 1854 | FEMALE | Kidney Clear Cell Renal Carcinoma |
| 59   | 479  | FEMALE | Kidney Clear Cell Renal Carcinoma |
| 48   | 1489 | MALE   | Kidney Clear Cell Renal Carcinoma |
| 76   | 1111 | MALE   | Kidney Clear Cell Renal Carcinoma |
| 34   | 1107 | MALE   | Kidney Clear Cell Renal Carcinoma |
| 74   | 334  | MALE   | Kidney Clear Cell Renal Carcinoma |
| 70   | 1133 | MALE   | Kidney Clear Cell Renal Carcinoma |
| 42   | 168  | MALE   | Kidney Clear Cell Renal Carcinoma |
| 57   | 1128 | MALE   | Kidney Clear Cell Renal Carcinoma |
| 42   | 211  | MALE   | Kidney Clear Cell Renal Carcinoma |
| 48   | 1416 | MALE   | Kidney Clear Cell Renal Carcinoma |
| 47   | 1617 | MALE   | Kidney Clear Cell Renal Carcinoma |
| 42   | 645  | MALE   | Kidney Clear Cell Renal Carcinoma |
| 58   | 1497 | FEMALE | Kidney Clear Cell Renal Carcinoma |
| 63   | 2422 | MALE   | Kidney Clear Cell Renal Carcinoma |
| 51   | 1435 | MALE   | Kidney Clear Cell Renal Carcinoma |
| 85   | 2258 | FEMALE | Kidney Clear Cell Renal Carcinoma |
| 73   | 2283 | FEMALE | Kidney Clear Cell Renal Carcinoma |
| 67   | 2353 | MALE   | Kidney Clear Cell Renal Carcinoma |
| null | null | null   | null                              |
| 71   | 2186 | FEMALE | Kidney Clear Cell Renal Carcinoma |



|      |      |        |                                   |
|------|------|--------|-----------------------------------|
| 41   | 2013 | MALE   | Kidney Clear Cell Renal Carcinoma |
| 72   | 993  | FEMALE | Kidney Clear Cell Renal Carcinoma |
| 64   | 2125 | MALE   | Kidney Clear Cell Renal Carcinoma |
| 42   | 1951 | FEMALE | Kidney Clear Cell Renal Carcinoma |
| 48   | 931  | MALE   | Kidney Clear Cell Renal Carcinoma |
| 59   | 1566 | MALE   | Kidney Clear Cell Renal Carcinoma |
| 63   | 1945 | FEMALE | Kidney Clear Cell Renal Carcinoma |
| 72   | 2085 | MALE   | Kidney Clear Cell Renal Carcinoma |
| 57   | 818  | FEMALE | Kidney Clear Cell Renal Carcinoma |
| 65   | 1520 | FEMALE | Kidney Clear Cell Renal Carcinoma |
| 76   | 749  | FEMALE | Kidney Clear Cell Renal Carcinoma |
| null | null | MALE   | Kidney Clear Cell Renal Carcinoma |
| 62   | 1200 | MALE   | Kidney Clear Cell Renal Carcinoma |
| 68   | 1404 | MALE   | Kidney Clear Cell Renal Carcinoma |
| 56   | 1432 | MALE   | Kidney Clear Cell Renal Carcinoma |
| 39   | 1943 | MALE   | Kidney Clear Cell Renal Carcinoma |
| 60   | 205  | MALE   | Kidney Clear Cell Renal Carcinoma |
| 63   | 445  | MALE   | Kidney Clear Cell Renal Carcinoma |
| 46   | 1843 | MALE   | Kidney Clear Cell Renal Carcinoma |
| 77   | 637  | FEMALE | Kidney Clear Cell Renal Carcinoma |
| 77   | 1345 | MALE   | Kidney Clear Cell Renal Carcinoma |
| 79   | 402  | FEMALE | Kidney Clear Cell Renal Carcinoma |
| 33   | 239  | MALE   | Kidney Clear Cell Renal Carcinoma |
| 75   | 838  | FEMALE | Kidney Clear Cell Renal Carcinoma |
| 53   | 654  | MALE   | Kidney Clear Cell Renal Carcinoma |
| 49   | 2660 | MALE   | Kidney Clear Cell Renal Carcinoma |
| 46   | 2172 | MALE   | Kidney Clear Cell Renal Carcinoma |
| 47   | 1935 | MALE   | Kidney Clear Cell Renal Carcinoma |
| 58   | 1785 | MALE   | Kidney Clear Cell Renal Carcinoma |
| 63   | 1834 | MALE   | Kidney Clear Cell Renal Carcinoma |
| 54   | 1862 | FEMALE | Kidney Clear Cell Renal Carcinoma |
| 46   | 1871 | MALE   | Kidney Clear Cell Renal Carcinoma |
| 76   | 204  | MALE   | Kidney Clear Cell Renal Carcinoma |
| 40   | 1745 | MALE   | Kidney Clear Cell Renal Carcinoma |
| 63   | 1794 | FEMALE | Kidney Clear Cell Renal Carcinoma |
| 44   | 432  | MALE   | Kidney Clear Cell Renal Carcinoma |
| 40   | 1476 | MALE   | Kidney Clear Cell Renal Carcinoma |
| 43   | 1501 | FEMALE | Kidney Clear Cell Renal Carcinoma |
| 47   | 1384 | MALE   | Kidney Clear Cell Renal Carcinoma |
| 58   | 215  | MALE   | Kidney Clear Cell Renal Carcinoma |
| 40   | 1433 | MALE   | Kidney Clear Cell Renal Carcinoma |
| 77   | 1632 | MALE   | Kidney Clear Cell Renal Carcinoma |
| 57   | 454  | MALE   | Kidney Clear Cell Renal Carcinoma |
| 75   | 1097 | FEMALE | Kidney Clear Cell Renal Carcinoma |
| 42   | 1013 | MALE   | Kidney Clear Cell Renal Carcinoma |
| 67   | 1412 | FEMALE | Kidney Clear Cell Renal Carcinoma |
| 72   | 951  | MALE   | Kidney Clear Cell Renal Carcinoma |

|    |      |        |                                   |
|----|------|--------|-----------------------------------|
| 75 | 785  | MALE   | Kidney Clear Cell Renal Carcinoma |
| 41 | 1124 | FEMALE | Kidney Clear Cell Renal Carcinoma |
| 72 | 827  | MALE   | Kidney Clear Cell Renal Carcinoma |
| 58 | 117  | MALE   | Kidney Clear Cell Renal Carcinoma |
| 54 | 1413 | MALE   | Kidney Clear Cell Renal Carcinoma |
| 66 | 500  | MALE   | Kidney Clear Cell Renal Carcinoma |
| 54 | 1307 | MALE   | Kidney Clear Cell Renal Carcinoma |
| 68 | 1371 | MALE   | Kidney Clear Cell Renal Carcinoma |
| 49 | 931  | MALE   | Kidney Clear Cell Renal Carcinoma |
| 56 | 1266 | MALE   | Kidney Clear Cell Renal Carcinoma |
| 40 | 563  | MALE   | Kidney Clear Cell Renal Carcinoma |
| 43 | 1177 | FEMALE | Kidney Clear Cell Renal Carcinoma |
| 53 | 1126 | MALE   | Kidney Clear Cell Renal Carcinoma |
| 61 | 840  | MALE   | Kidney Clear Cell Renal Carcinoma |
| 45 | 1140 | MALE   | Kidney Clear Cell Renal Carcinoma |
| 46 | 1071 | MALE   | Kidney Clear Cell Renal Carcinoma |
| 52 | 1102 | MALE   | Kidney Clear Cell Renal Carcinoma |
| 42 | 1527 | MALE   | Kidney Clear Cell Renal Carcinoma |
| 69 | 1713 | FEMALE | Kidney Clear Cell Renal Carcinoma |

I Samples.

| lymphnode pathologic spread | number of lymphnodes examined | number of lymphnodes positive | person neoplasm cancer status | primary tumor pathologic spread | primary tumor pathologic spread for analysis |
|-----------------------------|-------------------------------|-------------------------------|-------------------------------|---------------------------------|----------------------------------------------|
| N0                          | null                          | null                          | null                          | T1b                             | T1                                           |
| N0                          | null                          | null                          | TUMOR FREE                    | T3b                             | T3                                           |
| NX                          | null                          | null                          | TUMOR FREE                    | T1                              | T1                                           |
| N0                          | null                          | null                          | TUMOR FREE                    | T1b                             | T1                                           |
| NX                          | null                          | null                          | TUMOR FREE                    | T2                              | T2                                           |
| N0                          | null                          | null                          | TUMOR FREE                    | T2                              | T2                                           |
| NX                          | null                          | null                          | TUMOR FREE                    | T1b                             | T1                                           |
| NX                          | null                          | null                          | TUMOR FREE                    | T1b                             | T1                                           |
| NX                          | null                          | null                          | TUMOR FREE                    | T1a                             | T1                                           |
| NX                          | null                          | null                          | TUMOR FREE                    | T1b                             | T1                                           |
| NX                          | null                          | null                          | TUMOR FREE                    | T1b                             | T1                                           |
| NX                          | null                          | null                          | TUMOR FREE                    | T1a                             | T1                                           |
| NX                          | null                          | null                          | TUMOR FREE                    | T1a                             | T1                                           |
| null                        | null                          | null                          | null                          | null                            | null                                         |
| N0                          | null                          | null                          | TUMOR FREE                    | T1b                             | T1                                           |
| N0                          | null                          | null                          | TUMOR FREE                    | T1                              | T1                                           |
| N0                          | null                          | null                          | TUMOR FREE                    | T2a                             | T2                                           |
| NX                          | null                          | null                          | WITH TUMOR                    | T1                              | T1                                           |
| N0                          | 1                             | 0                             | TUMOR FREE                    | T2                              | T2                                           |
| NX                          | null                          | null                          | WITH TUMOR                    | T1b                             | T1                                           |
| N0                          | null                          | null                          | null                          | T3a                             | T3                                           |
| null                        | null                          | null                          | null                          | null                            | null                                         |
| N0                          | null                          | null                          | TUMOR FREE                    | T2                              | T2                                           |
| NX                          | null                          | null                          | null                          | T1a                             | T1                                           |
| NX                          | null                          | null                          | TUMOR FREE                    | T3                              | T3                                           |
| N0                          | null                          | null                          | null                          | T1b                             | T1                                           |
| N0                          | null                          | null                          | TUMOR FREE                    | T1                              | T1                                           |
| N0                          | null                          | null                          | TUMOR FREE                    | T1                              | T1                                           |
| NX                          | null                          | null                          | WITH TUMOR                    | T1b                             | T1                                           |
| NX                          | null                          | null                          | null                          | T1                              | T1                                           |
| N1                          | 1                             | 1                             | null                          | T1b                             | T1                                           |
| N0                          | null                          | null                          | TUMOR FREE                    | T1b                             | T1                                           |
| N0                          | null                          | null                          | TUMOR FREE                    | T2a                             | T2                                           |
| N0                          | null                          | null                          | TUMOR FREE                    | T1a                             | T1                                           |
| NX                          | null                          | null                          | TUMOR FREE                    | T2                              | T2                                           |
| NX                          | null                          | null                          | TUMOR FREE                    | T1b                             | T1                                           |
| NX                          | null                          | null                          | TUMOR FREE                    | T1b                             | T1                                           |
| NX                          | null                          | null                          | TUMOR FREE                    | T1a                             | T1                                           |
| NX                          | null                          | null                          | TUMOR FREE                    | T1b                             | T1                                           |

|    |      |      |            |      |    |
|----|------|------|------------|------|----|
| N0 | 2    | 0    | WITH TUMOR | null |    |
| NX | null | null | TUMOR FREE | T1a  | T1 |
| NX | null | null | WITH TUMOR | T1b  | T1 |
| N0 | 3    | 0    | TUMOR FREE | T1b  | T1 |
| N0 | 9    | 0    | TUMOR FREE | T3a  | T3 |
| NX | null | null | TUMOR FREE | T3a  | T3 |
| NX | null | null | TUMOR FREE | T3a  | T3 |
| NX | 0    | 0    | TUMOR FREE | T1b  | T1 |
| N0 | 4    | 0    | TUMOR FREE | T3a  | T3 |
| NX | null | null | WITH TUMOR | T2b  | T2 |
| N1 | 3    | 2    | WITH TUMOR | T3a  | T3 |
| N0 | null | null | TUMOR FREE | T2   | T2 |
| N0 | null | null | TUMOR FREE | T3a  | T3 |
| NX | 0    | 0    | WITH TUMOR | T3a  | T3 |
| N0 | null | null | TUMOR FREE | T2b  | T2 |
| N0 | null | null | WITH TUMOR | T3a  | T3 |
| N0 | 5    | 0    | TUMOR FREE | T1b  | T1 |
| N0 | null | 0    | WITH TUMOR | T1b  | T1 |
| N0 | 3    | 0    | TUMOR FREE | T3a  | T3 |
| N0 | 2    | 0    | WITH TUMOR | T1b  | T1 |
| N0 | 10   | 0    | TUMOR FREE | T3a  | T3 |
| N0 | 2    | 0    | WITH TUMOR | T2   | T2 |
| N0 | 13   | 0    | TUMOR FREE | T1b  | T1 |
| N0 | 5    | 0    | TUMOR FREE | T2   | T2 |
| N0 | 3    | 0    | TUMOR FREE | T2   | T2 |
| NX | null | null | TUMOR FREE | T1b  | T1 |
| N0 | null | null | TUMOR FREE | T1b  | T1 |
| N0 | 3    | 0    | TUMOR FREE | T1b  | T1 |
| N0 | 6    | 0    | TUMOR FREE | T2   | T2 |
| N0 | 1    | 0    | TUMOR FREE | T3a  | T3 |
| N0 | 13   | 0    | TUMOR FREE | T3a  | T3 |
| N0 | null | null | WITH TUMOR | T1a  | T1 |
| N0 | null | null | TUMOR FREE | T3a  | T3 |
| N0 | 1    | 0    | TUMOR FREE | T3a  | T3 |
| N0 | null | null | WITH TUMOR | T3a  | T3 |
| N0 | 1    | 0    | TUMOR FREE | T3b  | T3 |
| N0 | null | null | TUMOR FREE | T1b  | T1 |
| N0 | null | null | TUMOR FREE | T1b  | T1 |
| NX | null | null | WITH TUMOR | T3a  | T3 |
| N0 | 7    | 0    | WITH TUMOR | T2   | T2 |
| N0 | 7    | 0    | WITH TUMOR | T3a  | T3 |
| NX | null | null | TUMOR FREE | T1a  | T1 |
| N0 | 1    | 0    | TUMOR FREE | T3b  | T3 |
| N0 | 21   | 0    | TUMOR FREE | T3b  | T3 |
| NX | null | null | TUMOR FREE | T3b  | T3 |
| NX | null | null | null       | T1a  | T1 |
| N0 | 17   | 0    | WITH TUMOR | T3a  | T3 |

|      |      |      |            |      |      |
|------|------|------|------------|------|------|
| N0   | 10   | 0    | WITH TUMOR | T3b  | T3   |
| N0   | null | null | TUMOR FREE | T1   | T1   |
| N1   | 21   | 1    | WITH TUMOR | T4   | T4   |
| NX   | null | null | null       | T3a  | T3   |
| N0   | 1    | 0    | TUMOR FREE | T1b  | T1   |
| NX   | null | null | TUMOR FREE | T1a  | T1   |
| NX   | null | null | TUMOR FREE | T1a  | T1   |
| N1   | 16   | 2    | TUMOR FREE | T3a  | T3   |
| NX   | null | null | TUMOR FREE | T1a  | T1   |
| NX   | null | null | TUMOR FREE | T1a  | T1   |
| NX   | null | null | TUMOR FREE | T1a  | T1   |
| N0   | 7    | 0    | TUMOR FREE | T1a  | T1   |
| NX   | null | null | TUMOR FREE | T1a  | T1   |
| N0   | 5    | 0    | TUMOR FREE | T3a  | T3   |
| NX   | null | null | TUMOR FREE | T1a  | T1   |
| NX   | null | null | WITH TUMOR | T1a  | T1   |
| NX   | null | null | TUMOR FREE | T1a  | T1   |
| NX   | null | null | TUMOR FREE | T1a  | T1   |
| null | null | null | null       | null | null |
| N0   | 0    | 0    | TUMOR FREE | T1a  | T1   |
| null | null | null | null       | null | null |
| N0   | 0    | 0    | WITH TUMOR | T1b  | T1   |
| N0   | 0    | 0    | TUMOR FREE | T1   | T1   |
| N0   | 0    | 0    | TUMOR FREE | T1b  | T1   |
| NX   | null | null | TUMOR FREE | T1a  | T1   |
| NX   | null | null | TUMOR FREE | T1a  | T1   |
| N0   | 19   | 0    | WITH TUMOR | T3a  | T3   |
| NX   | null | null | TUMOR FREE | T1a  | T1   |
| NX   | null | null | TUMOR FREE | T1a  | T1   |
| N0   | 5    | 0    | TUMOR FREE | T3b  | T3   |
| N0   | 30   | 0    | WITH TUMOR | T3b  | T3   |
| N0   | 2    | 0    | WITH TUMOR | T3b  | T3   |
| N0   | 3    | 0    | WITH TUMOR | T3b  | T3   |
| NX   | null | null | TUMOR FREE | T1a  | T1   |
| NX   | null | null | TUMOR FREE | T1a  | T1   |
| NX   | null | null | TUMOR FREE | T1b  | T1   |
| NX   | null | null | TUMOR FREE | T2   | T2   |
| N0   | 14   | 0    | WITH TUMOR | T3a  | T3   |
| NX   | 0    | null | TUMOR FREE | T3a  | T3   |
| NX   | 0    | null | TUMOR FREE | T3a  | T3   |
| N0   | 1    | 0    | TUMOR FREE | T1b  | T1   |
| N0   | 3    | 0    | TUMOR FREE | T3a  | T3   |
| N0   | 0    | null | TUMOR FREE | T1b  | T1   |
| NX   | 0    | null | WITH TUMOR | T3a  | T3   |
| null | null | null | null       | null | null |
| NX   | 0    | null | TUMOR FREE | T3a  | T3   |

|    |      |      |            |     |    |
|----|------|------|------------|-----|----|
| NX | 0    | null | WITH TUMOR | T3a | T3 |
| NX | 0    | null | TUMOR FREE | T3a | T3 |
| NX | 0    | null | WITH TUMOR | T3a | T3 |
| NX | 0    | null | TUMOR FREE | T1a | T1 |
| NX | 0    | null | WITH TUMOR | T3a | T3 |
| NX | 0    | null | WITH TUMOR | T3a | T3 |
| NX | 1    | 0    | TUMOR FREE | T1a | T1 |
| N0 | 1    | 0    | WITH TUMOR | T3a | T3 |
| N0 | 5    | 0    | TUMOR FREE | T3c | T3 |
| N0 | 2    | 0    | TUMOR FREE | T1b | T1 |
| NX | null | null | TUMOR FREE | T1b | T1 |
| N0 | 3    | 0    | WITH TUMOR | T3a | T3 |
| NX | null | null | WITH TUMOR | T3a | T3 |
| N0 | 2    | 0    | TUMOR FREE | T1b | T1 |
| N0 | 3    | 0    | WITH TUMOR | T3a | T3 |
| NX | 0    | null | WITH TUMOR | T2  | T2 |
| NX | 0    | null | WITH TUMOR | T4  | T4 |
| NX | 0    | null | WITH TUMOR | T2  | T2 |
| NX | 0    | null | TUMOR FREE | T1b | T1 |
| N0 | 0    | 0    | TUMOR FREE | T3a | T3 |
| N0 | 0    | 0    | TUMOR FREE | T1a | T1 |
| N0 | 0    | 0    | WITH TUMOR | T3b | T3 |
| N1 | 1    | 1    | WITH TUMOR | T3a | T3 |
| N0 | 0    | 0    | TUMOR FREE | T3a | T3 |
| N0 | 0    | 0    | TUMOR FREE | T1b | T1 |
| NX | null | null | TUMOR FREE | T1b | T1 |
| N0 | 9    | 0    | TUMOR FREE | T2  | T2 |
| NX | null | null | TUMOR FREE | T1a | T1 |
| NX | null | null | TUMOR FREE | T2  | T2 |
| NX | null | null | TUMOR FREE | T1b | T1 |
| N0 | 11   | 0    | TUMOR FREE | T1a | T1 |
| NX | null | null | TUMOR FREE | T1a | T1 |
| N0 | 5    | 0    | TUMOR FREE | T3a | T3 |
| N0 | 3    | 0    | TUMOR FREE | T1b | T1 |
| NX | null | null | TUMOR FREE | T1a | T1 |
| N0 | 2    | 0    | TUMOR FREE | T1a | T1 |
| N0 | 5    | 0    | TUMOR FREE | T3a | T3 |
| NX | null | null | TUMOR FREE | T3a | T3 |
| NX | null | null | TUMOR FREE | T3a | T3 |
| N0 | 7    | 0    | WITH TUMOR | T2  | T2 |
| NX | null | null | TUMOR FREE | T1b | T1 |
| NX | null | null | TUMOR FREE | T1a | T1 |
| NX | null | null | TUMOR FREE | T1b | T1 |
| NX | null | null | TUMOR FREE | T3a | T3 |
| NX | null | null | TUMOR FREE | T1b | T1 |
| NX | null | null | TUMOR FREE | T3a | T3 |
| N0 | 22   | 0    | WITH TUMOR | T3a | T3 |

|    |      |      |            |     |    |
|----|------|------|------------|-----|----|
| N0 | 4    | 0    | TUMOR FREE | T1a | T1 |
| NX | null | null | TUMOR FREE | T1b | T1 |
| N0 | 1    | 0    | TUMOR FREE | T1a | T1 |
| N0 | 10   | 0    | TUMOR FREE | T3a | T3 |
| NX | null | null | TUMOR FREE | T1a | T1 |
| NX | null | null | TUMOR FREE | T1b | T1 |
| NX | null | null | TUMOR FREE | T1a | T1 |
| N0 | 5    | 0    | TUMOR FREE | T1b | T1 |
| NX | null | null | TUMOR FREE | T1a | T1 |
| NX | null | null | TUMOR FREE | T1a | T1 |
| NX | null | null | TUMOR FREE | T1b | T1 |
| NX | null | null | TUMOR FREE | T1b | T1 |
| NX | null | null | TUMOR FREE | T1a | T1 |
| N0 | 2    | 0    | TUMOR FREE | T1a | T1 |
| N0 | 10   | 0    | TUMOR FREE | T2  | T2 |
| NX | null | null | TUMOR FREE | T1a | T1 |
| NX | null | null | WITH TUMOR | T1b | T1 |
| NX | null | null | TUMOR FREE | T1b | T1 |
| N1 | 14   | 1    | WITH TUMOR | T4  | T4 |

| tumor grade | vital status | white cell count result | year of initial pathologic diagnosis |
|-------------|--------------|-------------------------|--------------------------------------|
| G3          | LIVING       | null                    | 2005                                 |
| G2          | LIVING       | Normal                  | 2006                                 |
| G2          | DECEASED     | null                    | 2005                                 |
| G3          | DECEASED     | null                    | 2005                                 |
| G3          | LIVING       | null                    | 2005                                 |
| G2          | LIVING       | null                    | 2005                                 |
| G2          | LIVING       | null                    | 2006                                 |
| G1          | LIVING       | null                    | 2005                                 |
| G2          | LIVING       | null                    | 2006                                 |
| G1          | LIVING       | null                    | 2006                                 |
| G3          | LIVING       | null                    | 2006                                 |
| G2          | LIVING       | null                    | 2006                                 |
| G1          | LIVING       | null                    | 2006                                 |
| null        | null         | null                    | null                                 |
| G2          | LIVING       | null                    | 2007                                 |
| G2          | LIVING       | null                    | 2005                                 |
| G4          | LIVING       | null                    | 2006                                 |
| G4          | LIVING       | null                    | 2007                                 |
| G3          | LIVING       | null                    | 2005                                 |
| G3          | DECEASED     | null                    | 2005                                 |
| G3          | DECEASED     | null                    | 2005                                 |
| null        | null         | null                    | null                                 |
| G2          | LIVING       | null                    | 2006                                 |
| G2          | LIVING       | null                    | 2006                                 |
| G2          | LIVING       | null                    | 2007                                 |
| G2          | LIVING       | null                    | 2005                                 |
| G3          | LIVING       | null                    | 2006                                 |
| G2          | LIVING       | null                    | 2007                                 |
| G3          | LIVING       | null                    | 2007                                 |
| G2          | LIVING       | null                    | 2006                                 |
| G2          | LIVING       | null                    | 2005                                 |
| G2          | LIVING       | null                    | 2006                                 |
| G2          | LIVING       | null                    | 2007                                 |
| G2          | LIVING       | null                    | 2005                                 |
| G2          | LIVING       | Normal                  | 2010                                 |
| G2          | LIVING       | Normal                  | 2010                                 |
| G2          | DECEASED     | Normal                  | 2010                                 |
| G2          | LIVING       | Normal                  | 2010                                 |
| G2          | LIVING       | Normal                  | 2010                                 |



|      |          |          |      |
|------|----------|----------|------|
| G3   | DECEASED | Normal   | 2002 |
| G2   | LIVING   | Low      | 2010 |
| null | LIVING   | Elevated | 2002 |
| G2   | LIVING   | Elevated | 2002 |
| G3   | LIVING   | Normal   | 2002 |
| G2   | DECEASED | Normal   | 2002 |
| G2   | LIVING   | Elevated | 2003 |
| G2   | LIVING   | Normal   | 2004 |
| G3   | LIVING   | Normal   | 2004 |
| G4   | DECEASED | Normal   | 2004 |
| G4   | DECEASED | Normal   | 2004 |
| G2   | LIVING   | Normal   | 2004 |
| G4   | LIVING   | Normal   | 2004 |
| G4   | DECEASED | Normal   | 2005 |
| G3   | LIVING   | Normal   | 2005 |
| G3   | DECEASED | Normal   | 2004 |
| G2   | LIVING   | Normal   | 2001 |
| G2   | DECEASED | Elevated | 2002 |
| G2   | LIVING   | Normal   | 2002 |
| G1   | LIVING   | Elevated | 2002 |
| G3   | LIVING   | Elevated | 2003 |
| G2   | DECEASED | Elevated | 2003 |
| G2   | DECEASED | Elevated | 2003 |
| G3   | LIVING   | Normal   | 2004 |
| G3   | LIVING   | Elevated | 2004 |
| G2   | LIVING   | Elevated | 2005 |
| G2   | LIVING   | Elevated | 2001 |
| G2   | LIVING   | Elevated | 2002 |
| G2   | DECEASED | Normal   | 2002 |
| G2   | LIVING   | Normal   | 2002 |
| G2   | LIVING   | Elevated | 2002 |
| G2   | DECEASED | Normal   | 2002 |
| G2   | LIVING   | Elevated | 2002 |
| G3   | LIVING   | Elevated | 2003 |
| G3   | DECEASED | Elevated | 2003 |
| G4   | DECEASED | Normal   | 2003 |
| G3   | LIVING   | Elevated | 2003 |
| G2   | DECEASED | Normal   | 2003 |
| G2   | DECEASED | Elevated | 2003 |
| G3   | DECEASED | Normal   | 2003 |
| G3   | DECEASED | Elevated | 2003 |
| G2   | LIVING   | Elevated | 2006 |
| G3   | LIVING   | Normal   | 2006 |
| G3   | DECEASED | Elevated | 2006 |
| G2   | LIVING   | Elevated | 2006 |
| G2   | LIVING   | Normal   | 2006 |
| G2   | LIVING   | Normal   | 2006 |

|      |          |          |      |
|------|----------|----------|------|
| G4   | DECEASED | Elevated | 2007 |
| G2   | DECEASED | Normal   | 2007 |
| G4   | DECEASED | Normal   | 2006 |
| G4   | DECEASED | Elevated | 2008 |
| G2   | LIVING   | Elevated | 2003 |
| G2   | LIVING   | Elevated | 2004 |
| G2   | LIVING   | Elevated | 2004 |
| G4   | LIVING   | Elevated | 2004 |
| G3   | DECEASED | Elevated | 2004 |
| G2   | DECEASED | Elevated | 2004 |
| G2   | LIVING   | Elevated | 2004 |
| G3   | LIVING   | Elevated | 2004 |
| G2   | LIVING   | Normal   | 2005 |
| G2   | LIVING   | Normal   | 2005 |
| G4   | DECEASED | Normal   | 2005 |
| G2   | LIVING   | Normal   | 2005 |
| G2   | LIVING   | Elevated | 2005 |
| G2   | LIVING   | Elevated | 2005 |
| G3   | LIVING   | Elevated | 2005 |
| null | null     | null     | null |
| G3   | DECEASED | Normal   | 2003 |
| null | null     | null     | null |
| G3   | DECEASED | Elevated | 2003 |
| G3   | DECEASED | Normal   | 2003 |
| GX   | DECEASED | Normal   | 2003 |
| G3   | LIVING   | Normal   | 2005 |
| G2   | LIVING   | Normal   | 2005 |
| G4   | DECEASED | Normal   | 2007 |
| G2   | LIVING   | Normal   | 2007 |
| G2   | DECEASED | Normal   | 2007 |
| G3   | LIVING   | Normal   | 2007 |
| G4   | DECEASED | Normal   | 2007 |
| G3   | DECEASED | Elevated | 2007 |
| G4   | DECEASED | Normal   | 2007 |
| G2   | LIVING   | Normal   | 2007 |
| G3   | LIVING   | Normal   | 2008 |
| G3   | LIVING   | Normal   | 2004 |
| G2   | LIVING   | Normal   | 2005 |
| G3   | DECEASED | null     | 2005 |
| G2   | LIVING   | Normal   | 2004 |
| G4   | LIVING   | Normal   | 2004 |
| G4   | LIVING   | Normal   | 2004 |
| G3   | LIVING   | Normal   | 2004 |
| G3   | LIVING   | Normal   | 2004 |
| G3   | LIVING   | Normal   | 2004 |
| null | null     | null     | null |
| G2   | LIVING   | Normal   | 2004 |

|      |          |          |      |
|------|----------|----------|------|
| G3   | LIVING   | Normal   | 2004 |
| null | LIVING   | Normal   | 2005 |
| G3   | LIVING   | Normal   | 2005 |
| G3   | LIVING   | Low      | 2005 |
| G3   | DECEASED | Normal   | 2005 |
| G4   | DECEASED | Normal   | 2005 |
| G4   | LIVING   | Normal   | 2005 |
| G4   | LIVING   | Normal   | 2005 |
| G4   | DECEASED | Normal   | 2005 |
| G2   | LIVING   | Normal   | 2005 |
| G3   | LIVING   | Normal   | 2005 |
| G2   | DECEASED | Normal   | null |
| G4   | DECEASED | Normal   | 2005 |
| G2   | DECEASED | Normal   | 2005 |
| G3   | DECEASED | Normal   | 2005 |
| G4   | LIVING   | Normal   | 2005 |
| G4   | DECEASED | Normal   | 2005 |
| G2   | DECEASED | Low      | 2005 |
| G2   | LIVING   | Elevated | 2006 |
| G2   | DECEASED | Normal   | 2005 |
| G3   | DECEASED | Normal   | 2005 |
| G2   | DECEASED | Elevated | 2005 |
| G3   | DECEASED | Normal   | 2006 |
| G3   | DECEASED | Normal   | 2004 |
| G2   | DECEASED | Normal   | 2006 |
| G3   | LIVING   | Elevated | 2003 |
| G3   | LIVING   | Normal   | 2004 |
| G2   | LIVING   | Elevated | 2005 |
| G2   | LIVING   | Elevated | 2005 |
| G3   | LIVING   | Elevated | 2005 |
| G2   | LIVING   | Elevated | 2005 |
| G2   | LIVING   | Normal   | 2005 |
| G2   | LIVING   | Elevated | 2005 |
| G3   | LIVING   | Elevated | 2006 |
| G2   | LIVING   | Elevated | 2006 |
| G3   | LIVING   | Normal   | 2006 |
| G3   | LIVING   | Normal   | 2006 |
| G3   | LIVING   | Elevated | 2006 |
| G3   | LIVING   | Elevated | 2006 |
| G4   | DECEASED | Elevated | 2006 |
| G3   | LIVING   | Elevated | 2006 |
| G3   | LIVING   | Normal   | 2006 |
| G3   | LIVING   | Elevated | 2006 |
| G3   | DECEASED | Elevated | 2006 |
| G3   | LIVING   | Elevated | 2006 |
| G4   | LIVING   | Elevated | 2006 |
| G4   | DECEASED | Elevated | 2006 |

|    |          |          |      |
|----|----------|----------|------|
| G3 | LIVING   | Elevated | 2006 |
| G2 | LIVING   | Elevated | 2006 |
| G2 | DECEASED | Elevated | 2007 |
| G3 | LIVING   | Elevated | 2007 |
| G2 | LIVING   | Elevated | 2007 |
| G4 | LIVING   | Normal   | 2007 |
| G3 | LIVING   | Elevated | 2007 |
| G3 | LIVING   | Elevated | 2007 |
| G3 | LIVING   | Normal   | 2007 |
| G2 | LIVING   | Elevated | 2007 |
| G3 | LIVING   | Elevated | 2007 |
| G2 | LIVING   | Elevated | 2007 |
| G3 | LIVING   | Elevated | 2007 |
| G2 | LIVING   | Elevated | 2007 |
| G2 | LIVING   | Elevated | 2007 |
| G2 | LIVING   | Elevated | 2007 |
| G3 | DECEASED | Elevated | 2007 |
| G2 | LIVING   | Normal   | 2006 |
| G4 | DECEASED | Elevated | 2006 |
