# Supplementary material for: Methylation profiling and evaluation of demethylating therapy in renal cell carcinoma
Source: PubMed Central journal article supplement (PMC3848591; doi:10.1186/1868-7083-5-16), 2013-09-13

# Additional file 6 Figure S4

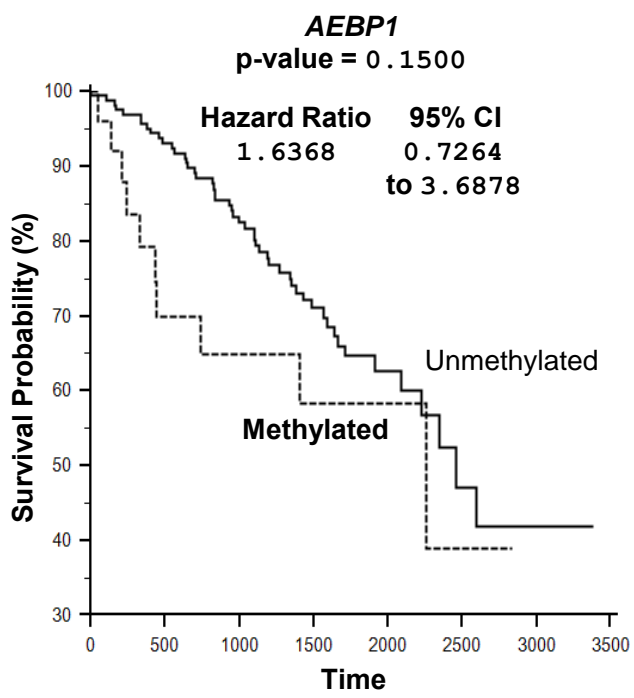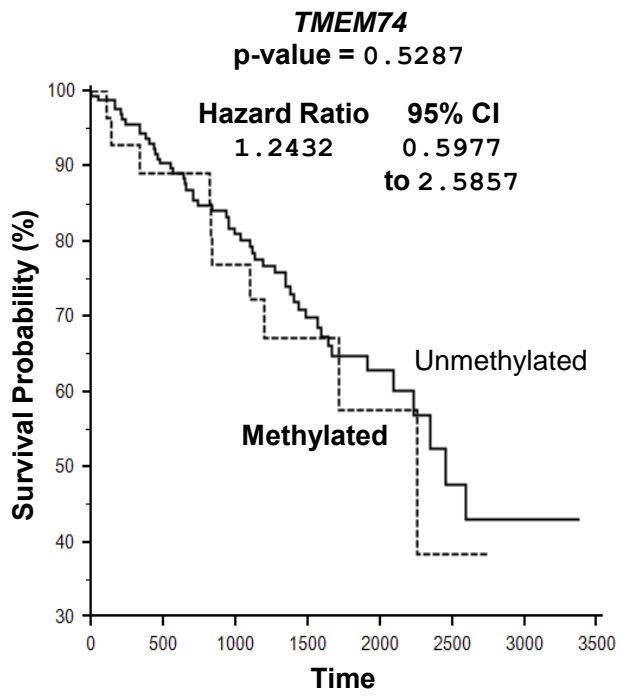

Supplement: 1868-7083-5-16-S6.pdf [file 1868-7083-5-16-S6.pdf]
